# Supplementary material for: A highly selective colorimetric sensor of mercury( ii ) ions and hydrogen peroxide by biosynthesized silver nanoparticles in water and investigations of the interaction between silver and mercury
Source: Royal Society of Chemistry journal article supplement (doi:10.1039/d5ra01733e), 2025-01-01
Supplement: d5ra01733e10.pdf [file d5ra01733e10.pdf]

## Highly selective colorimetric sensor of mercury(II) ions and hydrogen peroxide by biosynthesized silver nanoparticles in water and investigations of the interaction between silver-mercury

Md Toufiqul Islam,<sup>a</sup> Saurav Kumar Das,<sup>a</sup> Md. Ahad Mahamud Nahim,<sup>a</sup> Md. Rabiul Karim,<sup>b</sup> Rumpa Kundu,<sup>c</sup> Md. Abu Rayhan Khan,<sup>d</sup> Shofiur Rahman,<sup>\*e,f</sup> A. Al-gawati,<sup>e,f</sup> Abdullah N. Alodhayb,<sup>e,f,g</sup> and Habib Md. Ahsan<sup>\*a</sup>

---

<sup>a</sup> *Chemistry Discipline, Khulna University, Khulna-9208, Bangladesh.*

*E-mail: [ahsanhru@chem.ku.ac.bd](mailto:ahsanhru@chem.ku.ac.bd) (H.M.A.)*

<sup>b</sup> *Department of Chemistry, University of Rajshahi-6205, Bangladesh.*

<sup>c</sup> *Department of Environmental Studies for Advanced Society, Graduate School of Environmental Studies, Tohoku University, Sendai, Japan*

<sup>d</sup> *Department of Chemistry, Mississippi State University, 310 President Cir, Mississippi State, United States of America.*

<sup>e</sup> *Biological and Environmental Sensing Research Unit, King Abdullah Institute for Nanotechnology, King Saud University, Riyadh 11451, Saudi Arabia.*

*Email: [mrahman1@ksu.edu.sa](mailto:mrahman1@ksu.edu.sa) (S.R)*

<sup>f</sup> *King Salman Center for Disability Research, Riyadh 11614, Saudi Arabia.*

<sup>g</sup> *Department of Physics and Astronomy, College of Science, King Saud University, Riyadh 11451*

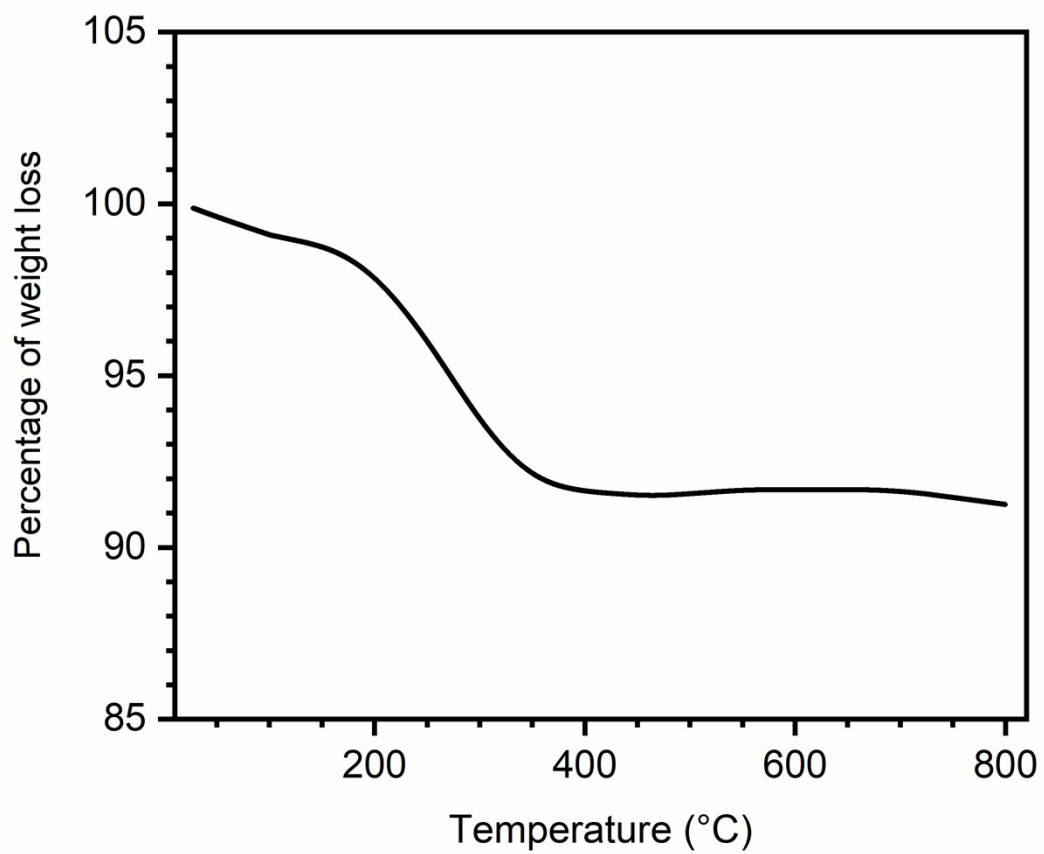

Figure S1. Thermogravimetric analysis (TGA) curve of AgNPs synthesized using Averrhoa bilimbi fruit extract at 60 °C and pH =10 for 30 min (Conditions: N<sub>2</sub> and 10 °C/min).

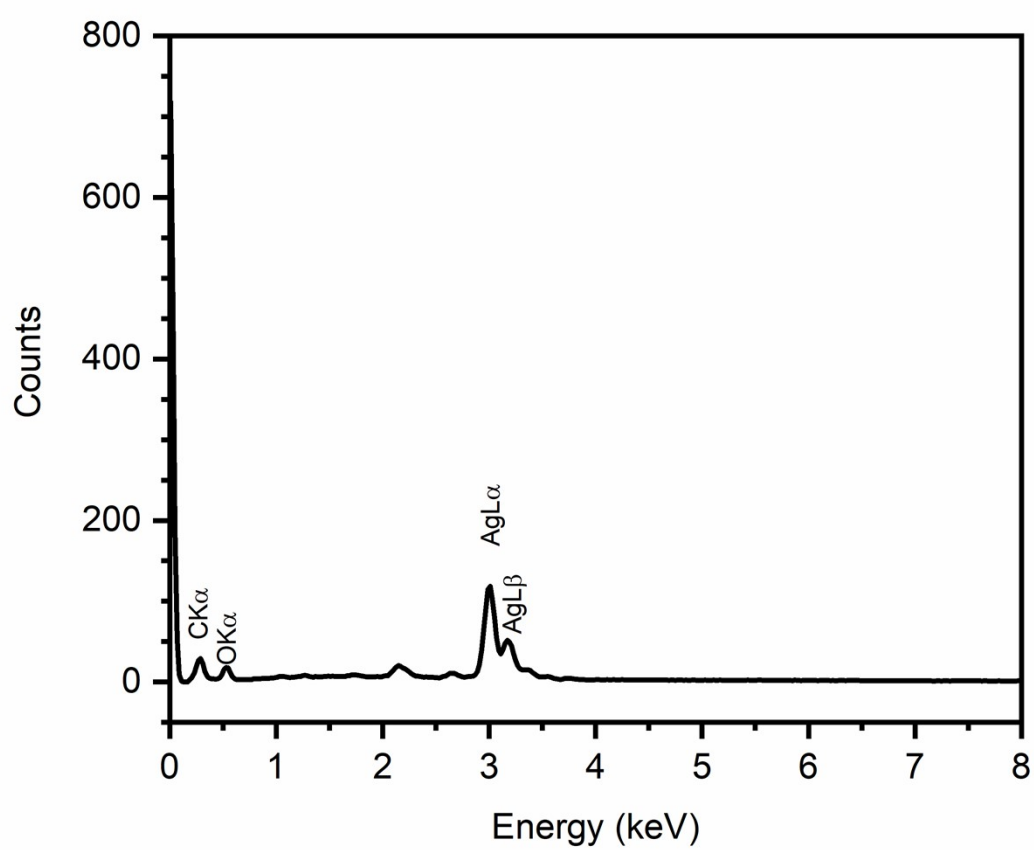

Figure S2. EDX spectrum of AgNPs synthesized using *Averrhoa bilimbi* fruit extract at 60 °C and pH =10 for 30 min

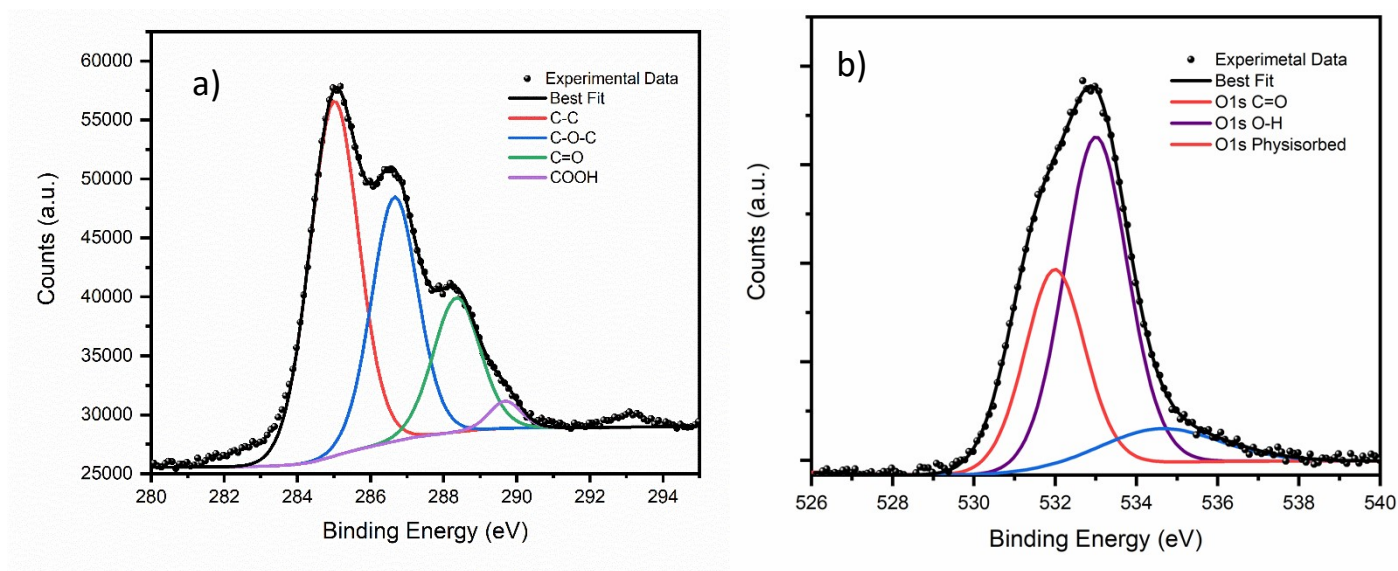

Figure S3. a) SR-XPS C1s core level spectra; b) SR-XPS O1s core level spectra.

Table S1: Results of the SR-XPS data analysis: relative intensity levels, BE (eV), FWHM (eV), and proposed signal assignments.

| Signal               | BE (eV) | Atomic ratio (exp.) | Assignment                    |
|----------------------|---------|---------------------|-------------------------------|
| Ag 3d <sub>5/2</sub> | 368.02  | 90.4                | Ag(0)                         |
|                      | 369.15  | 9.6                 | Ag( $\delta^+$ )              |
| Hg4f <sub>7/2</sub>  | 100.1   | 93.0                | Hg(0)                         |
|                      | 101.2   | 7.0                 | Hg(ii)                        |
| C 1s                 | 285.2   | 3.5                 | C-C                           |
|                      | 286.8   |                     | C-O-C                         |
|                      | 288.3   |                     | C=O Contaminants              |
|                      | 289.8   |                     | COOH Contaminants             |
|                      | 291     |                     | COO <sup>-</sup> Contaminants |
| O 1s                 | 532     | 3.15                | C=O                           |
|                      | 533     | 1.0                 | C-O                           |
|                      | 534.76  |                     | H <sub>2</sub> O physisorbed  |

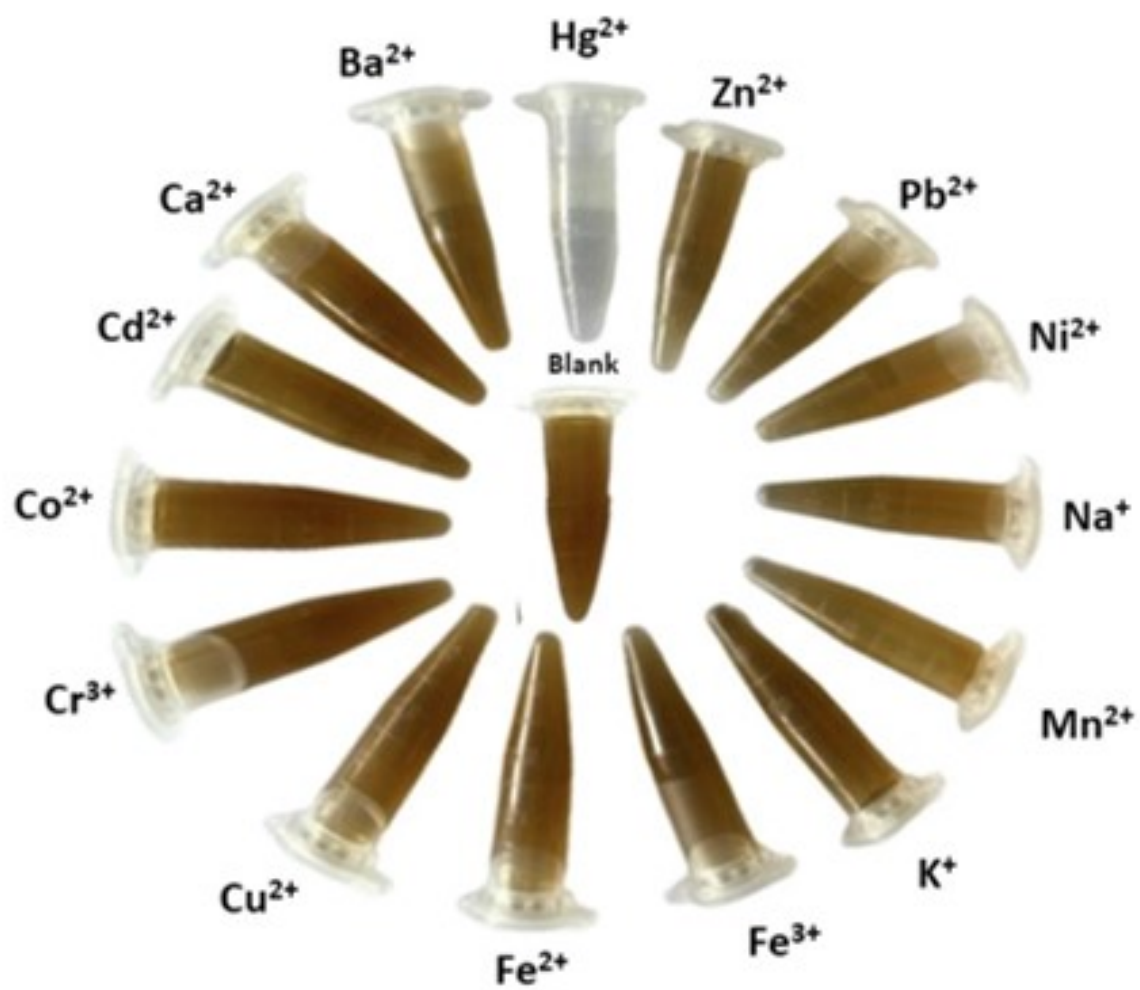

Figure S4: Colorimetric image of AgNPs with different metal ions

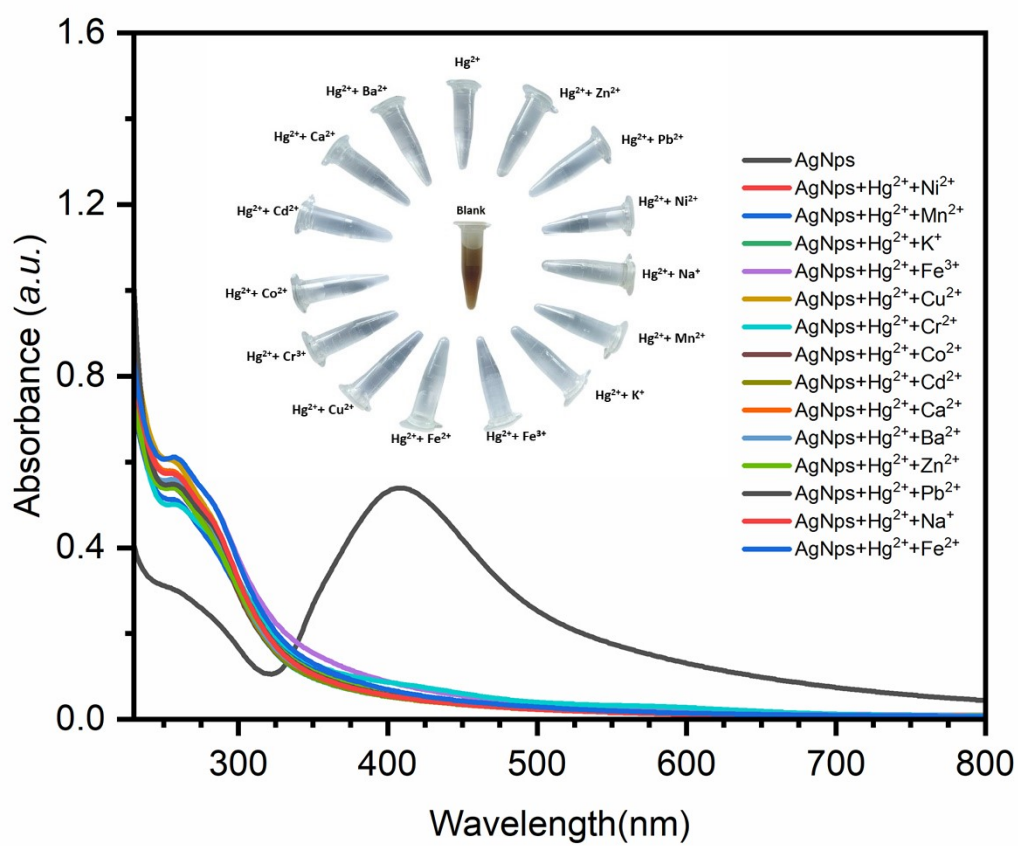

Figure S5: UV-vis absorption of AgNPs solutions incubated with  $\text{Hg}^{2+}$  and other 14 metal ions. Inside: Colorimetric images of AgNPs with equimolar  $\text{Hg}^{2+}$  and other metal ions.

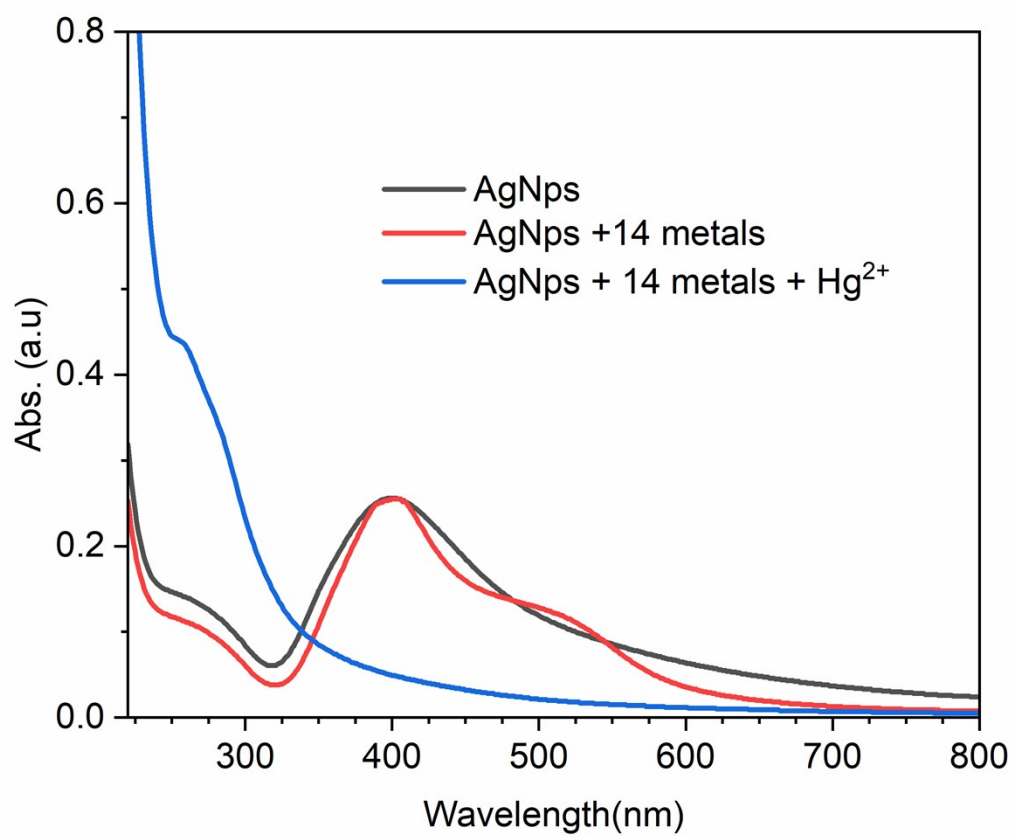

Figure S6. UV-vis spectra of AgNPs, AgNPs incubate with 14 other metal ions and AgNPs incubated with Hg<sup>2+</sup> along 14 other metal ions.

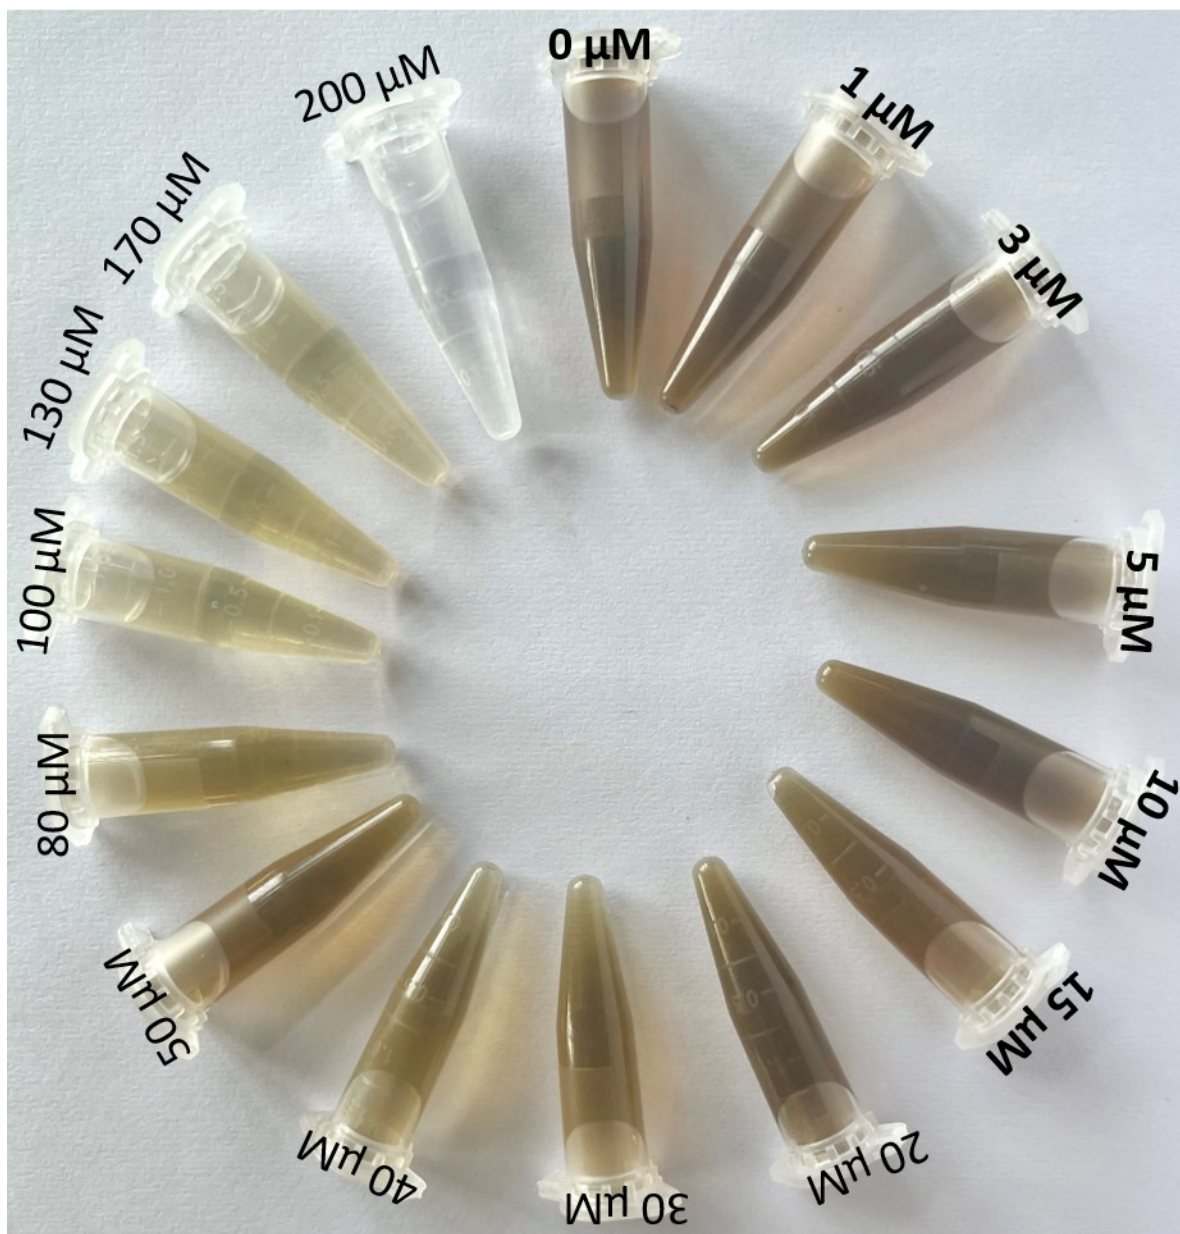

Figure S7: Colorimetric image of AgNPs with different concentration of  $\text{Hg}^{2+}$  ions.
