# Supplementary figures and images for: A highly selective colorimetric sensor of mercury( ii ) ions and hydrogen peroxide by biosynthesized silver nanoparticles in water and investigations of the interaction between silver and mercury
Source: Royal Society of Chemistry journal article supplement (doi:10.1039/d5ra01733e), 2025-01-01

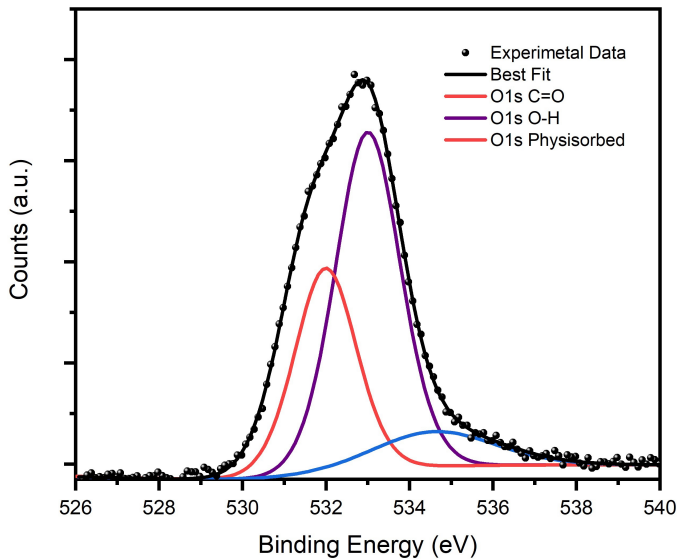

Supplement: d5ra01733e5.pdf [file d5ra01733e5.pdf]
